# Supplementary material for: OCT-based Visual Field Estimation via Segmentation-free 3D CNNs Shows Lower Longitudinal Variability than Standard Automated Perimetry
Source: bioRxiv or medRxiv preprint supplement (doi:10.1101/2024.08.17.24312150), 2025-05-03
Supplement: Supplementary file [file media-1.pdf]

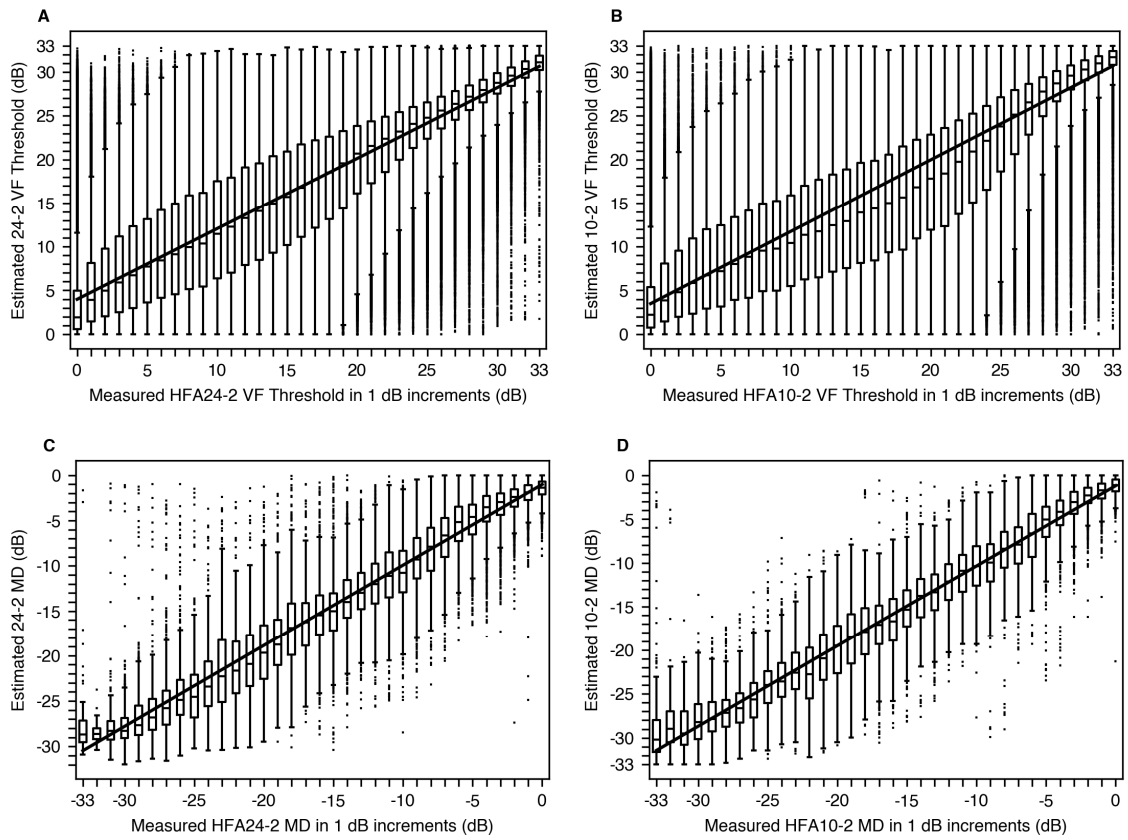

1

2 **Figure S3.** Correlations between measured and estimated VF parameters. (A) 24-2 VF threshold  
 3 (pointwise values, Pearson's  $r = 0.893$ ), (B) 10-2 VF threshold (pointwise values, Pearson's  $r = 0.902$ ),  
 4 (C) 24-2 MD (Pearson's  $r = 0.932$ ), and (D) 10-2 MD (Pearson's  $r = 0.945$ ). Each panel displays  
 5 boxplots of estimated values for each measured value increment and a regression line. All correlations  
 6 are significant at  $p < 0.001$ .  
 7 VF = visual field; MD = mean deviation.

8
