# Supplementary material for: OCT-based Visual Field Estimation via Segmentation-free 3D CNNs Shows Lower Longitudinal Variability than Standard Automated Perimetry
Source: bioRxiv or medRxiv preprint supplement (doi:10.1101/2024.08.17.24312150), 2025-05-03
Supplement: Supplementary file [file media-2.pdf]

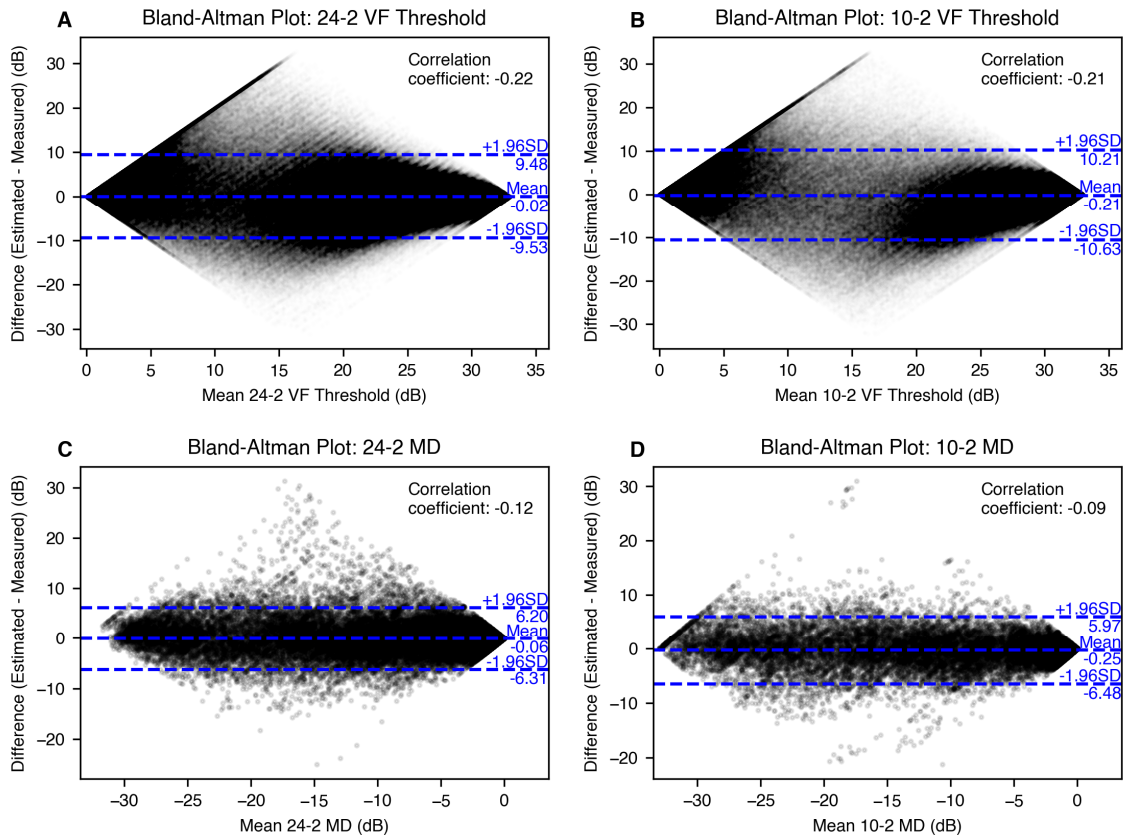

1  
2 **Figure S4.** Bland–Altman plots for agreement between measured and estimated VF parameters. (A)  
3 24–2 VF threshold (pointwise values), (B) 10–2 VF threshold (pointwise values), (C) 24–2 MD, and  
4 (D) 10–2 MD. The horizontal axis represents the mean of the measured and estimated values, whereas  
5 the vertical axis represents the difference between the estimated and measured values. The central  
6 dotted line indicates the mean difference, and the upper and lower dotted lines represent the 95%  
7 limits of agreement ( $\pm 1.96$  SD). The plots demonstrate good overall agreement between the estimated  
8 and measured values, with mean differences approaching zero for all analyses. Slight proportional  
9 biases were observed, with correlation coefficients ranging from -0.21 to -0.09. However, the  
10 magnitude of the error remained relatively small across different levels of VF loss.  
11 VF = visual field; MD = mean deviation; SD = standard deviation.  
12
