# Supplementary material for: OCT-based Visual Field Estimation via Segmentation-free 3D CNNs Shows Lower Longitudinal Variability than Standard Automated Perimetry
Source: bioRxiv or medRxiv preprint supplement (doi:10.1101/2024.08.17.24312150), 2025-05-03
Supplement: Supplementary file [file media-3.pdf]

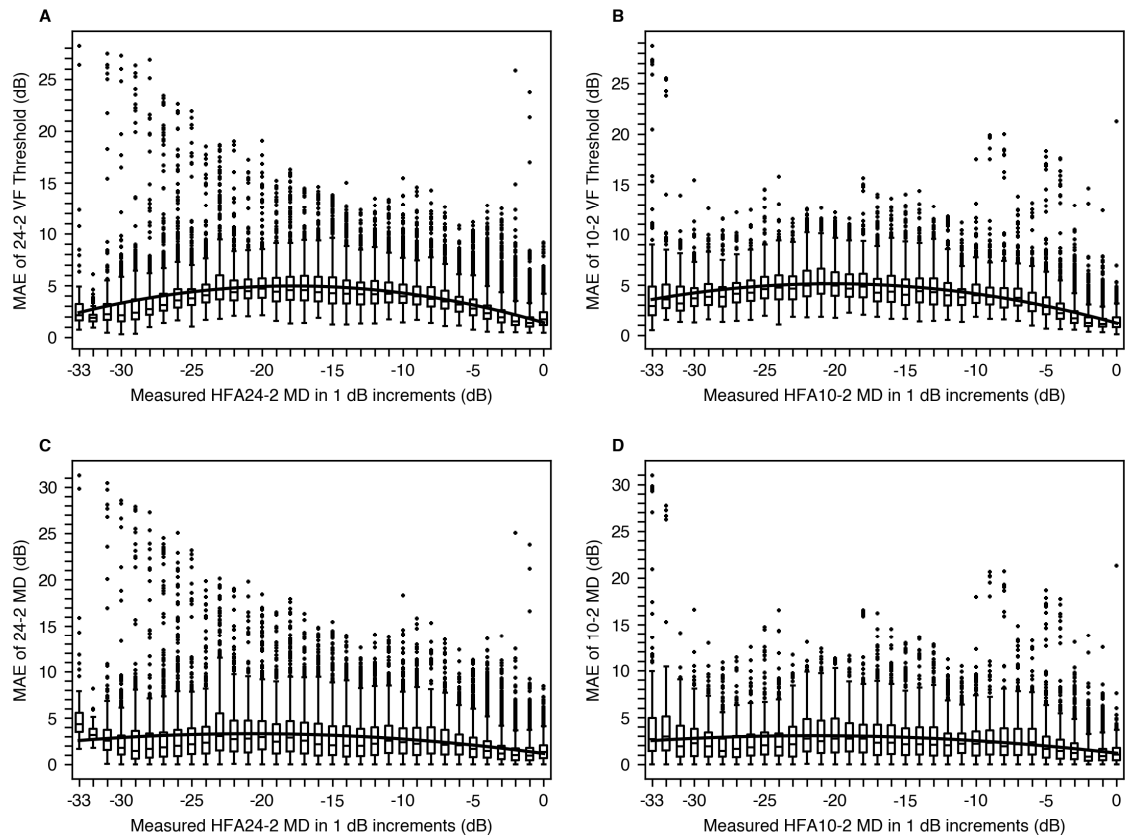

1

2 **Figure S5.** Relationships between VF severity and MAEs. (A) 24-2 VF threshold, (B) 10-2 VF  
3 threshold, (C) 24-2 MD, and (D) 10-2 MD. The horizontal axis represents VF severity (measured MD  
4 in 1 dB increments), and the vertical axis represents MAE (dB). Each panel shows boxplots of MAEs  
5 for each MD increment, along with a quadratic regression curve. For MD (C and D), MAEs remain  
6 relatively stable across severity levels. For thresholds (A and B), there are slight increases in MAE  
7 for moderate severity, but performances remain stable for advanced cases.  
8 VF = visual field; MAE = mean absolute error; MD = mean deviation.
