# Supplementary material for: OCT-based Visual Field Estimation via Segmentation-free 3D CNNs Shows Lower Longitudinal Variability than Standard Automated Perimetry
Source: bioRxiv or medRxiv preprint supplement (doi:10.1101/2024.08.17.24312150), 2025-05-03
Supplement: Supplementary file [file media-4.pdf]

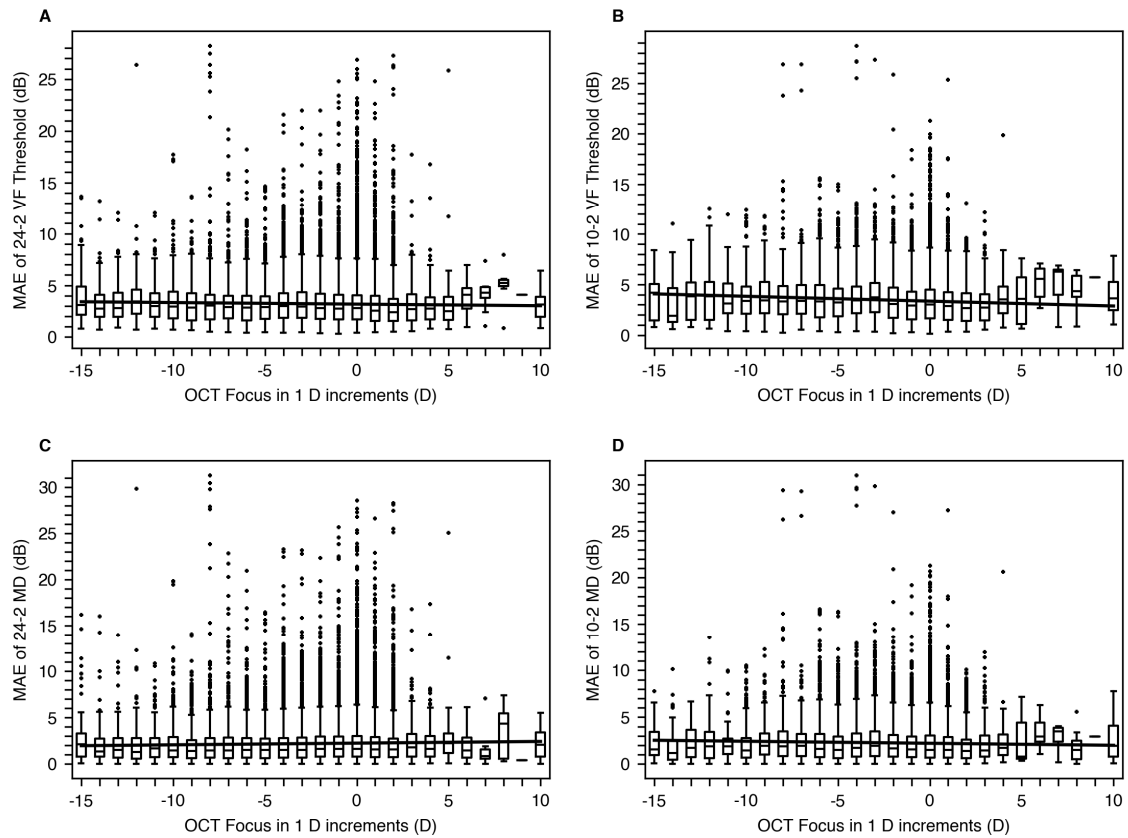

1

2 **Figure S6.** Impact of OCT focus on model performance. (A) 24-2 VF thresholds, (B) 10-2 VF  
3 thresholds, (C) 24-2 MD, and (D) 10-2 MD. The horizontal axis represents OCT focus in 1 D  
4 increments, and the vertical axis represents MAE. Each panel shows boxplots of MAEs for each OCT  
5 focus increment, with linear regression lines. Slight increases in MAEs are observed for myopic eyes  
6 in thresholds (A and B) and 10-2 MD (D). Linear regression analysis revealed slopes of -0.015 dB/D  
7 (24-2 VF thresholds), -0.048 dB/D (10-2 VF thresholds), 0.018 dB/D (24-2 MD), and -0.021 dB/D  
8 (10-2 MD). These small slopes quantify the minimal impact of refractive errors on model  
9 performance, with slightly more pronounced effects for 10-2 VF thresholds. Overall, the model  
10 demonstrates robust estimation capabilities across various refractive errors.  
11 OCT = optical coherence tomography; VF = visual field; MD = mean deviation; D = diopter; MAE  
12 = mean absolute error.
