# Supplementary material for: OCT-based Visual Field Estimation via Segmentation-free 3D CNNs Shows Lower Longitudinal Variability than Standard Automated Perimetry
Source: bioRxiv or medRxiv preprint supplement (doi:10.1101/2024.08.17.24312150), 2025-05-03
Supplement: Supplementary file [file media-5.pdf]

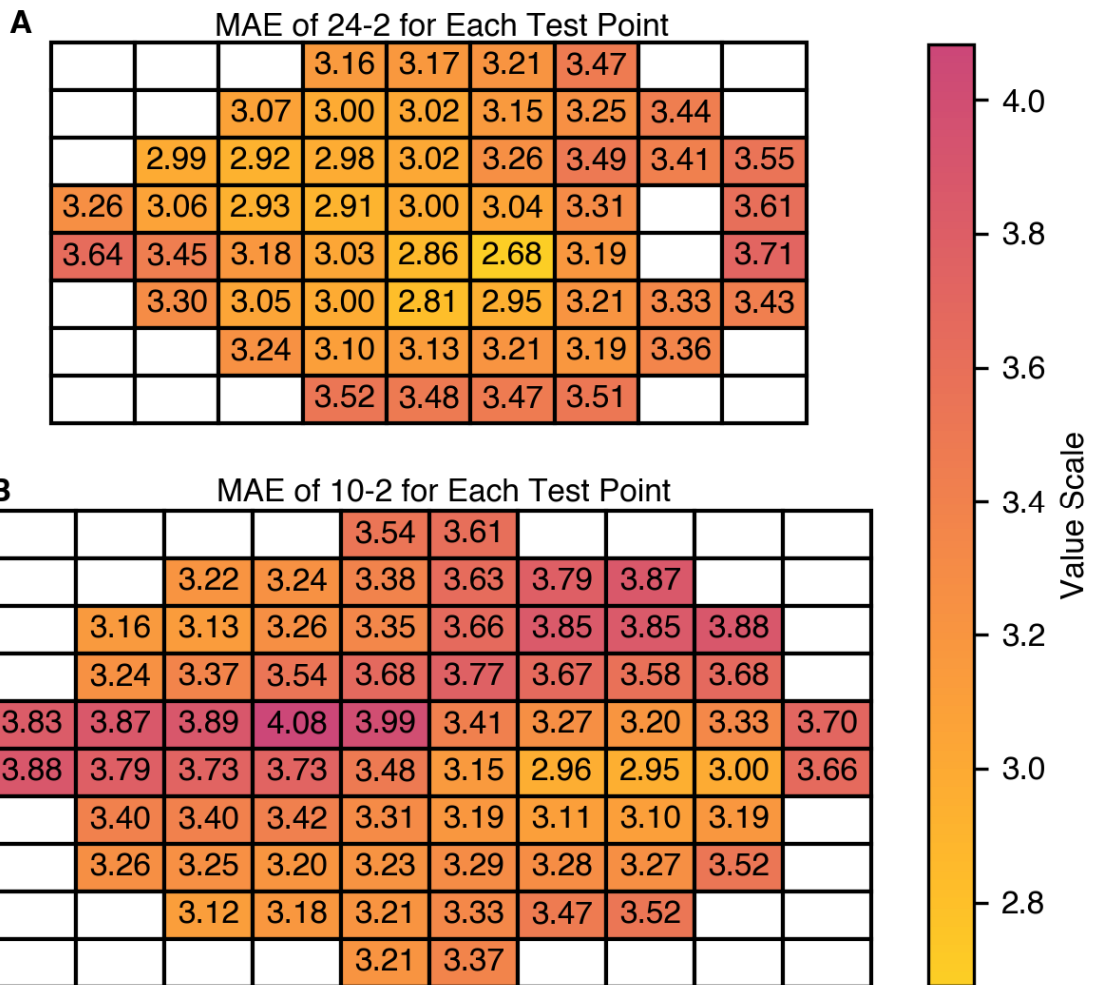

1

2 **Figure S7.** Heatmaps of the MAEs for each test point. (A) 24-2 test pattern, (B) 10-2 test pattern. The  
 3 color scale represents the magnitude of the MAE at each test point, revealing the spatial distribution  
 4 of estimation accuracy across the VF for both test patterns. We horizontally flipped the left eye data  
 5 and integrated them with the right eye data. For the 24-2 pattern, MAEs are generally consistent  
 6 across most VFs, with slight increases in peripheral areas beyond the OCT scan range and regions  
 7 surrounding the physiological blind spot. The 10-2 pattern shows a relatively stable distribution of  
 8 MAEs, with a modest increase in the central nasal area.  
 9 MAE = mean absolute error; VF = visual field; OCT = optical coherence tomography.
