# Supplementary material for: OCT-based Visual Field Estimation via Segmentation-free 3D CNNs Shows Lower Longitudinal Variability than Standard Automated Perimetry
Source: bioRxiv or medRxiv preprint supplement (doi:10.1101/2024.08.17.24312150), 2025-05-03
Supplement: Supplementary file [file media-6.pdf]

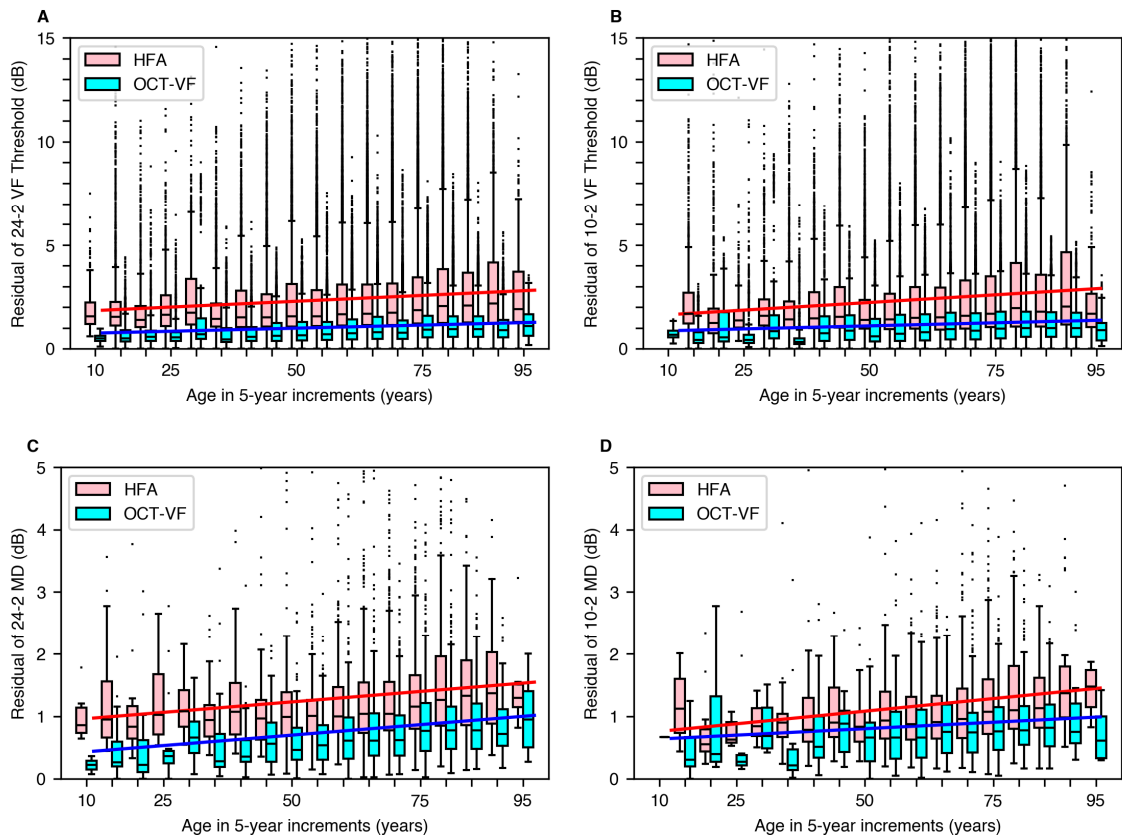

1

2 **Figure S10.** Comparison of residual variability between HFA measurements and OCT-VFs across  
3 age groups. (A) 24-2 thresholds, (B) 10-2 thresholds, (C) 24-2 MD, and (D) 10-2 MD. The horizontal  
4 axis represents age in 5-year increments, and the vertical axis represents residual variability. Each  
5 panel shows boxplots of residuals for each age group, along with linear regression lines for HFA (red)  
6 and OCT-VF (blue). The regression lines for OCT-VF consistently lie below those for HFA,  
7 indicating lower residual variability across all age groups. Both methods show increased variability  
8 with age, but HFA demonstrates steeper slopes, particularly for threshold measurements. The slopes  
9 of the regression lines (in dB/year) for HFA and OCT-VF are (A) 0.0112 vs. 0.00593, (B) 0.0147 vs.  
10 0.00591, (C) 0.00668 vs. 0.00667, and (D) 0.00806 vs. 0.00411, respectively. These values suggest  
11 that, compared with HFA, OCT-VF is less affected by age-related increases in variability.  
12 HFA = Humphrey Field Analyzer; OCT = optical coherence tomography; OCT-VF = OCT-based  
13 estimated visual field; MD = mean deviation.
