# Supplementary material for: OCT-based Visual Field Estimation via Segmentation-free 3D CNNs Shows Lower Longitudinal Variability than Standard Automated Perimetry
Source: bioRxiv or medRxiv preprint supplement (doi:10.1101/2024.08.17.24312150), 2025-05-03
Supplement: Supplementary file [file media-7.pdf]

**Table S1.** Population characteristics of the dataset used to train the 3DCNN model.

| Patient characteristics                  | Value*       |
|------------------------------------------|--------------|
| Total number of patients                 | 5351         |
| Number of patients in HFA24-2            | 5227         |
| Number of patients in HFA10-2            | 2047         |
| Total number of eyes                     | 9564         |
| Number of eyes in HFA24-2                | 9281         |
| Number of eyes in HFA10-2                | 3668         |
| Total number of sets of paired data      | 47653        |
| Number of sets of paired data in HFA24-2 | 45050        |
| Number of sets of paired data in HFA10-2 | 22230        |
| Number of HFA24-2 tests per eye          | 5.99 ± 6.72  |
| Number of HFA10-2 tests per eye          | 5.40 ± 4.80  |
| Interval between HFA24-2 tests (days)    | 243 ± 347    |
| Interval between HFA10-2 tests (days)    | 218 ± 226    |
| OCT to HFA24-2 interval (days)           | 27.3 ± 43.7  |
| OCT to HFA10-2 interval (days)           | 40.1 ± 57.2  |
| Number of OCT tests per eye              | 4.98 ± 5.17  |
| Mean deviation of the HFA24-2 (dB)       | -8.88 ± 8.80 |
| Mean deviation of the HFA10-2 (dB)       | -11.2 ± 9.65 |
| Age (years)                              | 69.0 ± 14.8  |
| SSI                                      | 8.58 ± 1.06  |
| Focus (D)                                | -1.73 ± 3.10 |

SD, standard deviation; HFA, Humphrey Field Analyzer; SSI, signal strength index of OCT image; OCT, optical coherence tomography.

\*Values are presented as N or mean ± standard deviation as appropriate.
