# Supplementary material for: OCT-based Visual Field Estimation via Segmentation-free 3D CNNs Shows Lower Longitudinal Variability than Standard Automated Perimetry
Source: bioRxiv or medRxiv preprint supplement (doi:10.1101/2024.08.17.24312150), 2025-05-03
Supplement: Supplementary file [file media-8.pdf]

**Table S2.** Correlations between estimated and measured visual field parameters

---

| <b>Parameter</b> | <b>Pearson's r</b> | <b>Spearman's <math>\rho</math></b> | <b>MAE (dB)</b> |
|------------------|--------------------|-------------------------------------|-----------------|
| 24-2 Thresholds  | 0.893*             | 0.867*                              | 3.21 $\pm$ 2.13 |
| 10-2 Thresholds  | 0.902*             | 0.884*                              | 3.45 $\pm$ 2.24 |
| 24-2 MD          | 0.932*             | 0.893*                              | 2.22 $\pm$ 2.30 |
| 10-2 MD          | 0.945*             | 0.940*                              | 2.25 $\pm$ 2.25 |

---

MAE = mean absolute error; MD = mean deviation.

\*All correlations significant at  $p < 0.001$

---
