# Supplementary material for: OCT-based Visual Field Estimation via Segmentation-free 3D CNNs Shows Lower Longitudinal Variability than Standard Automated Perimetry
Source: bioRxiv or medRxiv preprint supplement (doi:10.1101/2024.08.17.24312150), 2025-05-03
Supplement: Supplementary file [file media-9.pdf]

**Table S4.** Residual variability analysis using generalized estimating equations

| Analysis        | Coefficients               |                 |                        |        | Working correlation |
|-----------------|----------------------------|-----------------|------------------------|--------|---------------------|
|                 | OCT-VF effect*<br>(95% CI) | Number of tests | Follow-up duration     | Age    |                     |
| 24-2 Thresholds | -1.41 (-1.46, -1.36)       | -0.0127         | -6.50×10 <sup>-6</sup> | 0.0083 | 0.289               |
| 24-2 MD         | -0.531 (-0.575, -0.486)    | -0.0098         | 1.36×10 <sup>-5</sup>  | 0.0066 | 0.216               |
| 10-2 Thresholds | -1.24 (-1.30, -1.17)       | -0.0133         | -7.36×10 <sup>-5</sup> | 0.0101 | 0.277               |
| 10-2 MD         | -0.306 (-0.368, -0.244)    | -0.0132         | 5.16×10 <sup>-5</sup>  | 0.0059 | 0.192               |

OCT = optical coherence tomography; OCT-VF = OCT-based estimated visual field; HFA = Humphrey Field Analyzer; MD = mean deviation.

\*Coefficient represents the difference between OCT-VF and HFA. Negative values indicate lower residual variability for OCT-VF. All  $p < 0.001$  obtained from Generalized Estimating Equations with Bonferroni correction.
